# Supplementary material for: Oral toxicity of arjunolic acid on hematological, biochemical and histopathological investigations in female Sprague Dawley rats
Source: PeerJ. 2019 Nov 22;7:e8045. doi: 10.7717/peerj.8045 (PMC6876537; doi:10.7717/peerj.8045)
Supplement: Supplemental Information 2 — Body weight (BW), relative organ weight (ROW), food and water intake (F&W), hematology and biochemical parameters. [file peerj-07-8045-s002.xlsx]

## Sheet: BW Variation
Groups	Fasting wt	Days
		1	2	3	4	5	6	7	Difference in wt	% body wt change	8	9	10	11	12	13	14	Difference in wt	% body wt change
Group1 AA 300 mg/kg
1	260	263	266	270	273	274	278	279	19	7.30769	282	284	285	285	282	286	292	32	12.3077
2	261	263	267	270	274	279	282	283	22	8.42912	291	291	292	290	285	286	298	37	14.1762
3	266	268	269	269	270	271	273	274	8	3.00752	284	286	284	285	287	286	294	28	10.5263
4	266	267	266	268	269	269	272	273	7	2.63158	266	267	268	269	280	278	284	18	6.76692
5	263	265	268	269	270	272	276	276	13	4.94297	289	292	292	293	280	283	288	25	9.5057
6	263	268	271	273	277	280	284	287	24	9.12548	298	298	300	300	296	294	298	35	13.308
Group 2 AA 2000 mg/kg									0	#DIV/0!								0	#DIV/0!
1	267	270	273	278	281	285	287	289	22	8.2397	296	294	294	295	288	292	299	32	11.985
2	240	243	247	249	253	255	257	258	18	7.5	253	253	255	255	260	259	260	20	8.33333
3	250	257	263	270	277	285	290	294	44	17.6	298	297	298	300	269	316	305	55	22
4	252	253	255	257	258	260	262	263	11	4.36508	263	260	262	263	268	266	261	9	3.57143
5	253	256	259	264	268	268	269	271	18	7.11462	285	286	285	286	278	290	301	48	18.9723
6	247	251	255	258	263	268	272	274	27	10.9312	272	266	265	265	272	275	282	35	14.17
Control									0									0	#DIV/0!
1	285	286	287	290	290	292	294	294	9	3.15789	296	298	300	303	308	312	314	29	10.1754
2	265	268	272	275	278	282	284	286	21	7.92453	290	295	296	298	300	301	302	37	13.9623
3	250	252	253	256	256	258	262	263	13	5.2	266	265	270	275	276	276	278	28	11.2
4	255	256	258	262	263	266	269	270	15	5.88235	274	278	282	286	288	289	289	34	13.3333
5	260	262	263	268	270	272	275	278	18	6.92308	280	284	286	290	294	295	296	36	13.8462
6	265	266	265	268	271	274	276	278	13	4.90566	282	286	288	291	295	300	302	37	13.9623
					Body weight of animals (control and treated groups)

## Sheet: RWO
			Brain			Heart			Stomach			Lungs			Liver			pancreas			Spleen			Left Kidney			Right Kidney			Left Adrenal gland			Right Adrenal gland			Urinary bladder			Uterus			Cervics/vag			Left Ovary			Right Ovary
Rat	Group	sex (n=6)	Ab. Weight (g)	Body weight at sacrifice (g)	Relative weight of organ (g)	Ab. Weight(g)	Body weight at sacrifice (g)	Relative weight of organ (g)	Ab. Weight (g)	Body weight at sacrifice (g)	Relative weight of organ (g)	Ab. Weight (g)	Body weight at sacrifice (g)	Relative weight of organ (g)	Ab. Weight (g)	Body weight at sacrifice (g)	Relative weight of organ (g)	Ab. Weight (g)	Body weight at sacrifice (g)	Relative weight of organ (g)	Ab. Weight (g)	Body weight at sacrifice (g)	Relative weight of organ (g)	Ab. Weight (g)	Body weight at sacrifice (g)	Relative weight of organ (g)	Ab. Weight (g)	Body weight at sacrifice (g)	Relative weight of organ (g)	Ab. Weight (g)	Body weight at sacrifice (g)	Relative weight of organ (g)	Ab. Weight (g)	Body weight at sacrifice (g)	Relative weight of organ (g)	Ab. Weight (g)	Body weight at sacrifice (g)	Relative weight of organ (g)	Ab. Weight (g)	Body weight at sacrifice (g)	Relative weight of organ (g)	Ab. Weight (g)	Body weight at sacrifice (g)	Relative weight of organ (g)	Ab. Weight (g)	Body weight at sacrifice (g)	Relative weight of organ (g)	Ab. Weight (g)	Body weight at sacrifice (g)
1	control	f	1.96	314	0.624204	0.84	314	0.267516	2.13	314	0.678344	1.35	314	0.429936	9.68	314	3.0828	1.4	314	0.44586	0.68	314	0.216561	0.82	314	0.261146	0.82	314	0.261146	0.06	314	0.0191083	0.07	314	0.022293	0.1	314	0.0318471	1.15	314	0.366242	0.2	314	0.0636943	0.11	314	0.0350318	0.12	314
2	control	f	1.86	304	0.611842	0.84	313	0.268371	2.56	304	0.842105	1.36	313	0.434505	9	304	2.96053	1.39	313	0.444089	0.63	304	0.207237	0.82	313	0.261981	0.82	313	0.261981	0.05	304	0.0164474	0.04	304	0.0131579	0.1	304	0.0328947	1.16	304	0.381579	0.21	313	0.0670927	0.11	313	0.0351438	0.11	313
3	control	f	1.9	278	0.683453	0.84	312	0.269231	2.02	278	0.726619	1.34	312	0.429487	8.4	278	3.02158	1.39	312	0.445513	0.7	278	0.251799	0.82	312	0.262821	0.81	312	0.259615	0.07	278	0.0251799	0.06	278	0.0215827	0.1	278	0.0359712	1.21	278	0.435252	0.2	312	0.0641026	0.12	312	0.0384615	0.12	312
4	control	f	1.94	290	0.668966	0.83	311	0.266881	2.43	290	0.837931	1.35	311	0.434084	8.27	290	2.85172	1.41	311	0.453376	0.65	290	0.224138	0.82	311	0.263666	0.83	311	0.266881	0.06	290	0.0206897	0.06	290	0.0206897	0.09	290	0.0310345	1.41	290	0.486207	0.21	311	0.0675241	0.11	311	0.0353698	0.12	311
5	control	f	1.82	297	0.612795	0.84	312	0.269231	2.42	297	0.814815	1.36	312	0.435897	8.68	297	2.92256	1.4	312	0.448718	0.65	297	0.218855	0.82	312	0.262821	0.82	312	0.262821	0.08	297	0.026936	0.07	297	0.023569	0.1	297	0.03367	1.45	297	0.488215	0.22	312	0.0705128	0.12	312	0.0384615	0.12	312
6	control	f	1.81	305	0.593443	0.83	312	0.266026	2.36	305	0.77377	1.36	312	0.435897	8.68	305	2.8459	1.4	312	0.448718	0.57	305	0.186885	0.82	312	0.262821	0.81	312	0.259615	0.06	305	0.0196721	0.06	305	0.0196721	0.11	305	0.0360656	1.25	305	0.409836	0.2	312	0.0641026	0.11	312	0.0352564	0.12	312
1	AA 300mg/kg	f	2.65	282	0.939716	0.84	310	0.270968	1.61	282	0.570922	1.35	310	0.435484	7.92	282	2.80851	1.39	310	0.448387	0.93	282	0.329787	0.81	310	0.26129	0.83	310	0.267742	0.05	282	0.0177305	0.05	282	0.0177305	0.1	282	0.035461	2.36	282	0.836879	0.21	310	0.0677419	0.12	310	0.0387097	0.12	310
2	AA 300mg/kg	f	2.47	286	0.863636	0.84	314	0.267516	2.95	286	1.03147	1.34	314	0.426752	9.6	286	3.35664	1.4	314	0.44586	0.86	286	0.300699	0.82	314	0.261146	0.82	314	0.261146	0.06	286	0.020979	0.06	286	0.020979	0.09	286	0.0314685	1.84	286	0.643357	0.2	314	0.0636943	0.11	314	0.0350318	0.11	314
3	AA 300mg/kg	f	1.84	285	0.645614	0.85	313	0.271565	2.02	285	0.708772	1.36	313	0.434505	8.9	285	3.12281	1.41	313	0.450479	0.79	285	0.277193	0.82	313	0.261981	0.81	313	0.258786	0.07	285	0.0245614	0.04	285	0.0140351	0.08	285	0.0280702	1.08	285	0.378947	0.21	313	0.0670927	0.13	313	0.0415335	0.11	313
4	AA 300mg/kg	f	1.89	275	0.687273	0.84	312	0.269231	2.98	275	1.08364	1.36	312	0.435897	10.15	275	3.69091	1.4	312	0.448718	0.57	275	0.207273	0.81	312	0.259615	0.81	312	0.259615	0.07	275	0.0254545	0.05	275	0.0181818	0.09	275	0.0327273	1.15	275	0.418182	0.2	312	0.0641026	0.11	312	0.0352564	0.12	312
5	AA 300mg/kg	f	1.96	279	0.702509	0.85	312	0.272436	2.19	279	0.784946	1.35	312	0.432692	9.33	279	3.34409	1.39	312	0.445513	0.56	279	0.200717	0.82	312	0.262821	0.82	312	0.262821	0.06	279	0.0215054	0.07	279	0.0250896	0.1	279	0.0358423	1.25	279	0.448029	0.21	312	0.0673077	0.1	312	0.0320513	0.11	312
6	AA 300mg/kg	f	1.92	290	0.662069	0.84	315	0.266667	2.07	290	0.713793	1.35	315	0.428571	7.93	290	2.73448	1.39	315	0.44127	0.62	290	0.213793	0.81	315	0.257143	0.82	315	0.260317	0.05	290	0.0172414	0.06	290	0.0206897	0.1	290	0.0344828	1.25	290	0.431034	0.2	315	0.0634921	0.12	315	0.0380952	0.12	315
1	AA 2000 mg/kg	f	1.75	286	0.611888	0.85	311	0.273312	2.86	286	1	1.35	311	0.434084	9.45	286	3.3042	1.39	311	0.446945	0.74	286	0.258741	0.81	311	0.26045	0.81	311	0.26045	0.06	286	0.020979	0.08	286	0.027972	0.11	286	0.0384615	1.3	286	0.454545	0.2	311	0.0643087	0.12	311	0.0385852	0.11	311
2	AA 2000 mg/kg	f	2.19	257	0.85214	0.83	315	0.263492	3.07	257	1.19455	1.36	315	0.431746	8.69	257	3.38132	1.41	315	0.447619	0.58	257	0.225681	0.83	315	0.263492	0.83	315	0.263492	0.07	257	0.0272374	0.07	257	0.0272374	0.09	257	0.0350195	1.5	257	0.583658	0.21	315	0.0666667	0.11	315	0.0349206	0.12	315
3	AA 2000 mg/kg	f	1.91	293	0.651877	0.84	314	0.267516	2.07	293	0.706485	1.35	314	0.429936	9.06	293	3.09215	1.39	314	0.442675	0.62	293	0.211604	0.83	314	0.264331	0.84	314	0.267516	0.06	293	0.0204778	0.06	293	0.0204778	0.1	293	0.0341297	1.25	293	0.426621	0.22	314	0.0700637	0.13	314	0.0414013	0.11	314
4	AA 2000 mg/kg	f	1.79	259	0.69112	0.83	310	0.267742	1.82	259	0.702703	1.34	310	0.432258	7.79	259	3.00772	1.38	310	0.445161	0.59	259	0.227799	0.81	310	0.26129	0.83	310	0.267742	0.05	259	0.019305	0.08	259	0.030888	0.08	259	0.030888	1.22	259	0.471042	0.21	310	0.0677419	0.1	310	0.0322581	0.12	310
5	AA 2000 mg/kg	f	2.01	285	0.705263	0.84	312	0.269231	2.03	285	0.712281	1.36	312	0.435897	7.91	285	2.77544	1.37	312	0.439103	0.56	285	0.196491	0.82	312	0.262821	0.82	312	0.262821	0.08	285	0.0280702	0.05	285	0.0175439	0.08	285	0.0280702	1.23	285	0.431579	0.22	312	0.0705128	0.12	312	0.0384615	0.11	312
6	AA 2000 mg/kg	f	1.8	275	0.654545	0.83	311	0.266881	2.34	275	0.850909	1.36	311	0.437299	8.44	275	3.06909	1.41	311	0.453376	0.77	275	0.28	0.81	311	0.26045	0.81	311	0.26045	0.07	275	0.0254545	0.06	275	0.0218182	0.09	275	0.0327273	1.26	275	0.458182	0.2	311	0.0643087	0.11	311	0.0353698	0.1	311
								Relative organ weight (ROW)
[truncated: 7 more columns]

## Sheet: F&W intake
S.NO	DATE	CAGE 1 AA 300 mg/kg				CAGE 2 AA 2000 mg/kg				Control
		DIET (g)	WATER	Food intake(g)	Water intake(ml)	DIET	Water	Food intake(g)	Water intake(ml)	DIET	WATER	Food intake(g)	Water intake(ml)
2	2018-07-12	200	500	140	225	200	500	138	185	200	500	142	241
3	2018-08-12	200	500	141	180	200	500	139	192	200	500	144	220
4	2018-09-12	200	500	139	210	200	500	141	190	200	500	140	230
5	2018-10-12	200	500	140	150	200	500	140	200	200	500	138	200
6	2018-11-12	200	500	139	190	200	500	140	150	200	500	138	200
7	2018-12-12	200	500	142	170	200	500	141	220	200	500	139	210
8	13/12/18	200	500	140	170	200	500	138	220	200	500	140	190
9	14/12/18	200	500	138	170	200	500	137	210	200	500	140	190
10	15/12/18	200	500	139	165	200	500	142	200	200	500	141	180
11	16/12/18	200	500	140	170	200	500	140	190	200	500	140	180
12	17/12/18	200	500	141	100	200	500	141	100	200	500	142	100
13	18/12/18	200	500	142	175	200	500	142	260	200	500	138	210
14	19/12/18	200	500	140	180	200	500	137	210	200	500	139	200
15	20/12?18	200	500	139	180	200	500	138	220	200	500	140	200
							Food and water intake

## Sheet: hematology new
Group	Rat	RBCs 10x12/L	Hb g/dl	PCV (HCT) %	MCV fL	MCH pg	MCHC g/dL	Plat 10x9/L	WBCs 10x9/L	Neutrophil %	Lymphocyte %	Monocytes %	Eosinophils %	Basophils %	UREA mmol/L	Creatinine Umol/L	Calcium mmol/L	Inorganic Phosphate mmol/L	Uric Acid mmol/L	Sodium mmol/L	Potassium mmol/L	Chloride mmol/L	TC mmol/L	HDL mmol/L	LDL mmol/L	TG Umol/L	Total protein g/dL	Albumin g/dL	Globulin g/dL	Total Bilirubin Umol/L	Alkaline phosphatase IU/L	SGOT (AST) IU/L	SGPT (ALT) IU/L
CONTROL	1	7	12	33	56	17.6	30	1000	3	15	66	4	4	0	10	40	2.5	2.6	0.17	135	3	90	2	1.3	1.8	0.3	68	35	31	1	40	120	40
	2	7.2	11.9	34	55	17.8	30	1000	3.1	18	70	4	3	0	9.9	41	2.4	2.5	0.18	138	4	92	3	1.3	1.9	0.4	65	36	32	1	50	125	50
	3	7.5	12.1	35	57	18	31	1000	3.5	18	75	5	4	0	16	51	2.6	2.6	0.18	140	4.1	94	2	1.4	1.6	0.3	70	35	31	1	36	133	35
	4	7.4	12.6	35	58	18.2	30	1010	3.5	19	80	3	2	0	13	55	2.7	2.3	0.17	145	4.6	94	4	1.3	1.5	0.4	71	35	32	1	45	140	45
	5	7.5	13.8	33	60	17.8	30	1000	3.6	17	82	4	3	0	9	42	2.3	2	0.18	150	5	95	3.5	1.3	1	0.3	75	34	33	1	39	143	42
	6	7.8	14	34	62	17	30	1000	4	16	85	3	4	0	10	50	2.5	2.5	0.18	144	6	100	2.8	1.3	1.2	0.4	65	36	32	1	33	144	45
AA 300MG/KG	1	7	12.4	35	56	18	31	1000	2.8	41	49	6	4	0	9.9	46	2.72	6.1	0.17	148	8.7	99	2	1.3	1.1	0.4	67	35	32	1	35	122	50
	2	5.6	10	34	60	18	30	1000	2.9	21	68	9	2	0	15.2	67	2.51	6.6	0.18	145	10	97	2.3	1.4	1.5	0.3	65	35	31	1	51	125	50
	3	7.7	14.1	36	59	18	31	1010	3.8	18	70	6	6	0	10	48	2.44	6.25	0.16	144	11.6	99	2.5	1.3	1.8	0.4	72	36	30	1	21	130	40
	4	7.8	14.3	33	59	18	30	1000	2.8	19	74	3	4	0	11.2	41	2.54	6.4	0.16	148	9.9	98	3.2	1.3	2.3	0.4	82	34	32	1	32	136	44
	5	7.9	14.3	33	60	18	30	1010	2.9	19	75	2	4	0	11	40	2.55	6.5	0.16	149	9.8	98	3.1	1.4	2.3	0.3	82	36	32	1	31	125	44
	6	7.8	14.2	34	60	17	30	1000	3	20	75	2	4	0	12	41	2.56	6.6	0.16	150	9.8	99	3.2	1.4	2.4	0.4	81	35	31	1	31	128	45
AA 2000MG/KG	1	6.8	13.3	32	67	18	30	1000	3.5	21	72	5	2	0	8.7	49	2.67	8.12	0.17	144	10.1	94	2.7	1.3	1.9	0.4	80	35	32	1	65	128	50
	2	7.7	13.5	33	59	17	30	1000	3.3	34	57	4	5	0	10.9	49	2.65	7.02	0.18	145	8	93	2.9	1.3	2.1	0.4	76	36	31	1	82	135	50
	3	7.7	14.3	35	63	17	30	1010	3.3	29	63	6	2	0	9.4	51	2.2	6.88	0.18	147	8.7	103	2.2	1.2	1.6	0.4	63	34	32	1	48	140	40
	4	8	14	34	58	18	30	1000	3	23	71	4	2	0	9.7	47	2.68	6.21	0.18	148	7.7	103	2.6	1.3	1.8	0.4	74	35	30	1	36	145	38
	5	7.6	13	35	58	18	30	1010	3	24	70	4	2	0	9.9	48	2.67	6.2	0.17	145	7.5	102	2.4	1.4	1.9	0.3	73	35	32	1	37	135	39
	6	7.7	14	35	59	18	31	1000	2.5	25	70	5	3	0	10	49	2.65	6.3	0.16	145	7.5	103	2.5	1.3	2	0.4	75	34	31	1	38	125	40
								Hematology and biochemical data
